# Supplementary material
Source: PubMed Central journal article supplement (PMC3158569)
Supplement: NIHMS292526-supplement-Supplementary_Data.pdf [file NIHMS292526-supplement-Supplementary_Data.pdf]

**Supp. Methods**PCR Primer SequencesCase Number (*Gene*)Case 7 (*FAM58A*)

|    |                                  |
|----|----------------------------------|
| F5 | AGAGCCAGAAGAGAGTACCTAGACCCAGAG   |
| F4 | ATAAAGGCCTGAGTGAGAATAGCTGACCATC  |
| F3 | GAGAAGAAGTAGAAAAGTGCGAAGAGCTGAGT |
| F2 | CTATTGTTTAGTCCCTAGGTCACCTTTGTGC  |
| F1 | GAGTAAGTCCAGATTGAGCCAAAGTCCATAC  |
| R2 | GAAAGTAACCTATGTATCCCTCCTGCATGGT  |
| R1 | CTGCTGCTTTTTGTCTTATAAGCAGATGGACT |

Case 8 (*HPRT1*)

|    |                                  |
|----|----------------------------------|
| F1 | TCTAGTACAGACGTCCTTAGAACTGGAACCTG |
| R1 | AGTAGCTAGGAAATTTTTGTAGCTCCGCCAAC |

Case 11 (*NRXN1*)

|    |                                 |
|----|---------------------------------|
| Fs | GATGATCCCGTAGTATCAGCTAATCAGTGG  |
| F1 | ACAACCTAGGCCTGATCTAACACTTCTTCC  |
| F2 | GCCTCTGGTTAGGAGAATTAGGAGAGACTG  |
| R2 | CTAAGGCATGTTAGTCTGGAAGTACAACC   |
| R1 | CTGCCCTGTTCTGGTATTGTAGCCCTAAAC  |
| Rs | GCTCTGGAAAATCTAGTACTTGGTTGGGTGA |

Case 15 (*JAG1*)

|            |                                  |
|------------|----------------------------------|
| F sure 1   | CCCGTGGGAACAGTTATTAGGAGAACAGTC   |
| R uncert 1 | AGTCCTTTCCTCTATAGTCTGTCGCAACTAGG |
| R sure 1   | TAAAAAGAAACTCTTGGGCATAGCCAGTGAC  |

Case 17 (*SLC1A1*)

|            |                                  |
|------------|----------------------------------|
| F uncert 1 | GTCAGAGGAATAAACATGAGCTGATAACAGGA |
| F uncert 2 | GCCTGTAAAGTACCAGGCAACAGATTCTAGC  |
| F uncert 3 | TTTCCCCAAGCTATTTATATCTCCCCATT    |
| F uncert 4 | GAGCCCCACTCCTCAGAAGTAACCACTATT   |
| F uncert 5 | CTCTGCAATCCTCTTCTCCTACAAGCTTTC   |
| F uncert 6 | GCCCACATCTGGAAGCTGTAAGTAACAAGTA  |
| F uncert 7 | AGCTTTTGTTATCGTTACTACGGACACTGAG  |
| F uncert 8 | CTCGGGTAGGTTGAGATGGTCAGTTTATTCT  |
| F uncert 9 | CACCCTACTCAGAAGGAGCTTTGGTTACTAAG |
| F sure 1   | GAAGCCTCTCTGATTACCTCACACAAACATC  |
| R uncert 1 | GGAGAGGCTCAGAGATTAGGCTCTCTGTAGTT |
| R uncert 2 | CTGGTAACTATGTGTGGTCAGGACAAACTG   |
| R uncert 3 | CTGATTATGAAAGGCAGGAGAAAATCACTGAG |
| R sure 1   | CCATGTGGTTAATAACTAAACGACTTCCCTG  |

Case 17 (*MCCCI*)

|            |                                  |
|------------|----------------------------------|
| F uncert 1 | GAGTCACCTATGCTTGGAGTTATTTCTGGTG  |
| F uncert 2 | AGCATCCCTTGAAGTAGACCATTAGAGCAC   |
| F sure 1   | CACTGGTGTGAAACTAAAGTGTCTCAGGATAA |
| R uncert 1 | CTTGGTTGTTAATCATCTCTGACTGTGGTCT  |
| R sure 1   | CCCTGTTAACTTCCGTTTATTCTCTGGTCT   |

Case 18 (*CNTNAP2*)

|             |                                  |
|-------------|----------------------------------|
| F sure (F3) | TACTGATCTTGCCAGAAGGAAGAAATTAGAGC |
| R sure (R5) | AGTGGCGTTAGGAGTACAGATATGAGGGAGAC |

|                 |                                  |
|-----------------|----------------------------------|
| F uncert 1 (F1) | CAACTGCTGCTCAGTAGTAGGTCTTACACTCC |
| F uncert 2 (F2) | GGGAGAGCTTAGAATTCCAGAGACCCATAC   |
| R uncert 1 (R1) | ATCAGCACACACTACAACCAAGTAAGCGTCT  |
| R uncert 2 (R2) | TCCACTCTGTAAATTC AAGGCTACTGAGTTG |
| R uncert 3 (R3) | CCAGCTCAGTTCTAGGCTCCTAATTAAGTG   |
| R uncert 4 (R4) | AGGGTAAAGAGATAATGGATGAATGAGGCACT |

Case 19 (*ALDOA*)

|            |                                  |
|------------|----------------------------------|
| F sure 1   | AATGCTGCTTAGACTACAGGTCAGACATTGAT |
| R sure 1   | GTA CTCAAGGGCCAGACTCCTCTATAACACT |
| F uncert 1 | CTGACATACCACCTAAAATAAACCCAAGATGG |
| F uncert 2 | CCTAACTCAGCCTCTAGCTTCTCCAAACCT   |
| F uncert 3 | CTACAATACTTCACACGGTAGCCAGTAGCC   |
| R uncert 1 | CAACTTAGTTCTCAGTTCTCAGGGTTGTTGG  |
| R uncert 2 | CCCTGGCTATTCACCTCAAATAGACAGAAGG  |
| R uncert 3 | GAATTGGGCTGTGCTACTGTCAACAGAACT   |

Case 21 (*FHIT*)

|                 |                                   |
|-----------------|-----------------------------------|
| F uncert 1 (F1) | GATTGGTTTTATAGGCATCAGTGTGGATGT    |
| F uncert 2 (F2) | CTTCAACGCTCATTAAAAGCACAACCTCACTAC |
| F uncert 3 (F3) | CTCTGCCACCAGCCTCAGACTTAGTTTATA    |
| F uncert 4 (F4) | GTA CTTGTACAGATGCTGACACACAGAGAG   |
| F uncert 5 (F5) | GTTTAGGAGCAGAGGATCACCCGTA CTACTGT |
| R uncert 1 (R1) | GACGGAGGTTAAGTATTTTGAGGAGAGGTGT   |
| R uncert 4 (R2) | TGTAGCAGTGCATAGCAAAAATTTCTACCTGAT |

Case 22 (*TEK*)

|            |                                   |
|------------|-----------------------------------|
| F sure 1   | GGAAGTTACTCAAGATGTGACCAGAGAATGG   |
| R sure 1   | AAGTAAGGCTCAGAGCTGATGTTGATGACAG   |
| F uncert 1 | CTTTAAGAATACTTGGGATTGGAGAAGGATGG  |
| F uncert 2 | GGTAAACTCTGGACAGCAGTGAAACTCTGG    |
| F uncert 3 | TAACAATAACAGCATCTCAGGCTGATGAAC    |
| F uncert 4 | GATTATTAAGACTTGCTACCACCCACAAGG    |
| R uncert 1 | GCATAGCCTGGGCTTCTTATTAAGTGAGTAAT  |
| R uncert 2 | TACAATGCAGAACCTTTCAGATTTTCAGAGGAC |

Case 23 (*EXT2*)

|            |                                  |
|------------|----------------------------------|
| F uncert 1 | CAGAGTATTTACCAGAGGTGGGTAGAGTTCTG |
| F uncert 2 | GGGAAGAGGTGCTACTTACACTTGCTAGAGAC |
| F uncert 3 | GGATGAGACATAAGATACAAGGGCATGCTG   |
| F sure 1   | GAAGGTAAGAAGCCTTAGTGCCCTCTCTCAG  |
| R uncert 1 | GAGTCAAGGGAAGTGGTATTCAAGGAGACAT  |
| R uncert 2 | ATGGATCACAGTAAAGTGGAGGGGCATACAG  |
| R uncert 3 | AAATATCACCTATGGTCTGGAGATCAAGCAAC |
| R uncert 4 | GAAGAAAACAGGCTTTCCTACATGGTCTAGC  |
| R sure 1   | TCAGCCTCAGCTATGTAAGTAAGAACCAGAT  |

Case 24 (*TTC8*)

|            |                                  |
|------------|----------------------------------|
| F uncert 1 | GAATTATAACCAGGACATATGGTGGTCTTGCT |
| F sure 1   | CCTACATTCAACTGCTGATCATATGGGAAA   |
| R uncert 1 | GTTAAGAGGCTATGAAGACGATTCCTCTAC   |
| R uncert 2 | CCCAGGTCTATTTTACTACACAGGAACACCT  |
| R uncert 3 | AAGTCCAAAAGTAGGAGGAATTTTGGCAGA   |
| R sure 1   | GACAGAAACTCAAGTTGCTCATGTTCCAGAT  |

Case 25 (*REEP3*)

|            |                                  |
|------------|----------------------------------|
| F uncert 1 | GTCTGTGGTACTTCTAATTACTGCAGCCTACC |
| F uncert 2 | GCTCTCTGACGAAGTCCAAACTAGATAGCAT  |
| F uncert 3 | ATGGTATGTATTCTGAGCCTTTCTCCCTAAG  |
| F sure 1   | CTGTGGGACAAAAGACCATAACCAACCTCTAC |
| R uncert 1 | CTTGGCCAATACTCTGAGGAAGTCTCTGAAT  |

|            |                                |
|------------|--------------------------------|
| R uncert 2 | CGTTACCAAGGACAGACCATAAGGAGAGTG |
| R sure 1   | ATTAAGGTGTTTTTCCCCTTCTCAGTCTTC |

Case 26 (*MSH6*)

|            |                                  |
|------------|----------------------------------|
| F uncert 1 | GCACTTCTATGGTCCAGATGTTAGAGGGTAAG |
| R sure 1   | GTGACAGTGGGTATAAAACAGCCTGAAAAGTG |
| F sure 1   | ATCTACCAAGAAGGGCTGTAAACGATACTGG  |

Case 28 (*KIF7*)

|            |                                 |
|------------|---------------------------------|
| F sure 1   | CACAGATCCCCTGTCTAGGAAATCGACTCTT |
| R uncert 1 | ATCAGAGGTCTCAGAGGTGAAGACACCAAC  |
| R uncert 2 | CTCAGTGGCTATATGGGGCATACTTCTTC   |
| R uncert 3 | CCCCTCTATTAGCTCCCCTCTATTGCAC    |
| R uncert 4 | AAATTTGGTATTCTCATGCTTTCCTCTAGC  |
| R uncert 5 | CCTCTCTCTAAAGCCCAGCTTAATTCCAG   |
| R uncert 6 | ATCTAGAGACCTTTTGGCCTTGGTTCCTC   |
| R uncert 7 | GAGAGAGCGTAAAAATGGTCAAGTACATGGT |
| R uncert 8 | TTCTAAGAAGTGGGAATTCCTCCCTCAACTC |
| R sure 1   | CTCTCCAAGAGAGTATTGCATCTGGAGTTC  |

Case 29 (*KIF1B*)

|            |                                    |
|------------|------------------------------------|
| F uncert 1 | CTGACAGGAGAGCTTACATAGTCTTTCTTTCTTC |
| F uncert 2 | GGGTTCATCAGATGTGACCATGATATAAGAAG   |
| F sure 1   | CCTGTCCCATGTGAAGTTGAATAGATGTAAC    |
| R sure 1   | CCATAGACACTTCTCCTCTGACTCCCATAG     |

Case 30 (*DLG3*)

|            |                                 |
|------------|---------------------------------|
| F uncert 1 | AAGATCTATGACAAAAGCCATGAAACTGGAG |
| F sure 1   | CTCTGAGAGGGCAGCTTAGCAGATTTTTAG  |
| R uncert 1 | AGGGAAGAGGGACTTGATTTCTTCTGTTTAC |
| R sure 1   | CAGAGTCTGTCTTTCCATCAGTCTCCTCT   |

Case 31 (*NRXN1*)

|            |                                  |
|------------|----------------------------------|
| F sure 1   | GACTTCCCATCTCCCCAGTAACTCTGTATTA  |
| R sure 1   | CTGACAGTGCTAAGGGGAAGTAGCCTTTGT   |
| F uncert 1 | AGCTGTCTTTCTGGTGTACTCTCTCAGGGTAG |
| F uncert 2 | GCTAACACCCCTCATCATTAGCACACAGTAG  |
| F uncert 3 | GGACTCCTGCCTTTACCTCTGCTTTATGAC   |
| R uncert 1 | GTTCCCTATAAATTAAGCATGCCTGGGCTCT  |
| R uncert 2 | GCTGTGTTCTAATGTTACCCATGTCTAGCTG  |

## Control Primers

|             |                                  |
|-------------|----------------------------------|
| CTRL F sure | CTAGAAGGAACCTAGATAGGTCAAGCCTCTGC |
| CTRL R sure | AGAGGAGCTTCAGATGCTGGAAAGCTAGAG   |

Commercially Available MPLA Probe Sets (MRC-Holland)Case Number (*Gene*): Kit NameCase 1 (*MECP2*): **P015-D2**Case 2 (*PTEN*): **P225 PTEN**Case 3 (*EP300*): **P333-A1 EP300**Case 5 (*CREBBP*): **P313-A1 CREBBP**Case 14 (*EYA1*): **P153 EYA1**

Custom MLPA ProbesCase Number (*Gene*)Case 6 (*ZDHC9*):

| Probe   | Ligation Product Length | Left Probe Name | Start (ChrX) | Left Probe Sequence                                                            | Right Probe Name | End (ChrX)  | Right Probe Sequence                                                                |
|---------|-------------------------|-----------------|--------------|--------------------------------------------------------------------------------|------------------|-------------|-------------------------------------------------------------------------------------|
| LAT     | 104                     | LAT-F           |              | <u>GGGTTCCCTAAGGGTTGGAC</u><br><u>CTGCTGCTGCCATCCTGGCCA</u><br><u>TGTTGATG</u> | LAT--R           |             | <u>GCACTGTGTGTGCACTGCCACAG</u><br><u>ACTGCCAGTCTAGATTGGATCT</u><br><u>TGCTGGCAC</u> |
| ZDHC9-1 | 108                     | ZDHC9-1-F       | 128,767,601  | GGGTTCCCTAAGGGTTGGACA<br>GAGGTCTCTGTGACTGCCTCTG<br>GACTCAGCA                   | ZDHC9-1-R        | 128,767,666 | CGTGCAGCAGCTTGGGAGGATTT<br>GAGCCAGTCTTCTAGATTGGATC<br>TTGCTGGCAC                    |
| ZDHC9-2 | 112                     | ZDHC9-2-F       | 128,765,371  | GGGTTCCCTAAGGGTTGGATC<br>ACCACAGCCAATTTCCACCTGC<br>CCCCAGAGTT                  | ZDHC9-2-R        | 128,765,440 | TGGGATCAGTGCCAACCATCCTG<br>GCCTGGGAAAGTTCTAGATTGGA<br>TCTTGCTGGCAC                  |
| ZDHC9-3 | 116                     | ZDHC9-3-F       | 152,946,030  | GGGTTCCCTAAGGGTTGGATCT<br>TTGAGGGAGCTGCAGGTGGGG<br>CCGAATGAAATA                | ZDHC9-3-R        | 152,946,103 | AAGTGACGCTTGAATGCTGTGT<br>TCCCAACCACGACTTCTAGATTG<br>GATCTTGCTGGCAC                 |
| ZDHC9-4 | 120                     | ZDHC9-4-F       | 128,772,506  | GGGTTCCCTAAGGGTTGGAGT<br>AAATTAGCCTCCGCCCTCTCTA<br>TATCGACCCAGCCTT             | ZDHC9-4-R        | 128,772,583 | AAGTCAGGAACACTTACTGGGCT<br>CTGTGGCAAGAGGCTGTCTAGAT<br>TGGATCTTGCTGGCAC              |
| ZDHC9-5 | 124                     | ZDHC9-5-F       | 128,767,495  | GGGTTCCCTAAGGGTTGGAGA<br>TTGTGGGCAATGCTGGCACTT<br>GGTGGCCAGGAGAATCT            | ZDHC9-5-R        | 128,767,576 | TCTGACCCACTCTCCCTCTCTT<br>CAGTCTGAAGACCCACTCTAGA<br>TTGGATCTTGCTGGCAC               |
| ZDHC9-6 | 128                     | ZDHC9-6-F       | 128,764,757  | GGGTTCCCTAAGGGTTGGAGG<br>AGGGGGCTGGGTTGCTAGGTT<br>ACTACTAGAGCCAATCCAAG         | ZDHC9-6-R        | 128,764,842 | TGGTCCCAGAGGGGTACCAGATA<br>CAGGACAGGTCCTTCTCTTCTA<br>GATTGGATCTTGCTGGCAC            |
| ZDHC9-7 | 132                     | ZDHC9-7-F       | 128,768,210  | GGGTTCCCTAAGGGTTGGATA<br>GACACTGAACTCTTCTCTCAG<br>CCCCCTGATCACACTGATGCT        | ZDHC9-7-R        | 128,768,299 | ACAGATATGCAGCCACCAACACC<br>AAACTCAGAACCAACCAAGCT<br>CTAGATTGGATCTTGCTGGCAC          |

Case 16 (*RFC2*):

| Probe  | Ligation Product Length | Left Probe Name | Start (Chr7) | Left Probe Sequence                                                            | Right Probe Name | End (ChrX) | Right Probe Sequence                                                                |
|--------|-------------------------|-----------------|--------------|--------------------------------------------------------------------------------|------------------|------------|-------------------------------------------------------------------------------------|
| LAT    | 104                     | LAT-F           |              | <u>GGGTTCCCTAAGGGTTGGAC</u><br><u>CTGCTGCTGCCATCCTGGCCA</u><br><u>TGTTGATG</u> | LAT--R           |            | <u>GCACTGTGTGTGCACTGCCACAG</u><br><u>ACTGCCAGTCTAGATTGGATCT</u><br><u>TGCTGGCAC</u> |
| RFC2-1 | 108                     | RFC2-1-F        | 73,320,250   | GGGTTCCCTAAGGGTTGGATC<br>AGCGGGCTGTGAGTGGGGATT<br>GAGGACTTTC                   | RFC2-1-R         | 73,320,315 | CTACCAGAAACCTGAGTGCCCA<br>GCATGCCCTTTCTAGATTGGATCT<br>TGCTGGCAC                     |
| RFC2-2 | 112                     | RFC2-2-F        | 73,249,921   | GGGTTCCCTAAGGGTTGGATCT<br>GGTGATGGAGGACCCCGGACC<br>ACGACTAAATT                 | RFC2-2-R         | 73,249,990 | TTAGTAAGGCAGGCAAGGGCTGT<br>TCAGGTGGGAGCTCTAGATTGGA<br>TCTTGCTGGCAC                  |
| RFC2-3 | 116                     | RFC2-3-F        | 73,301,458   | GGGTTCCCTAAGGGTTGGAGC<br>TGTTTGCATCCCGTACCTCT<br>GACCCTGCATT                   | RFC2-3-R         | 73,301,531 | CACCCACAGCACACAGATCAA<br>TACAGTGGCCGGACTCAGATTG<br>GATCTTGCTGGCAC                   |
| RFC2-4 | 120                     | RFC2-4-F        | 73,354,321   | GGGTTCCCTAAGGGTTGGACA<br>GCGTTGGACCTTTTTTTGTGGC<br>TGGTGGTTCTGAGCA             | RFC2-4-R         | 73,354,398 | TGCCAACTCTGTGTGTGTCTAG<br>CTCCCGGAGACAGATCTAGATT<br>GGATCTTGCTGGCAC                 |
| RFC2-5 | 124                     | RFC2-5-F        | 73,332,023   | GGGTTCCCTAAGGGTTGGATGT<br>CCTCCACCCGGATAGTACA<br>GATGACGTTTGAAGTG              | RFC2-5-R         | 73,332,104 | TGACACAGTCCCGTGAAATTCC<br>TGGTGCATGAGTCAGCTTTCTAG<br>ATTGGATCTTGCTGGCAC             |
| RFC2-6 | 128                     | RFC2-6-F        | 73,301,177   | GGGTTCCCTAAGGGTTGGAGG<br>CAAGGCTTCGCATACAACCCA<br>ATGCTGAGAAAGGTTTTC           | RFC2-6-R         | 73,301,262 | TGTAACAATTCTCAATGCAGAGC<br>ACCCGCCCCCTACAGGTTCTCT<br>AGATTGGATCTTGCTGGCAC           |
| RFC2-7 | 132                     | RFC2-7-F        | 73,299,009   | GGGTTCCCTAAGGGTTGGATTC<br>CTCACAACGTCAATGCCCTGA<br>AAGAATGACAGGTTTTTACT        | RFC2-7-R         | 73,299,098 | GGCACCTTCTGAGACCAATTCAG<br>TTGCCTTACAAGGACTTTTAATC<br>TAGATTGGATCTTGCTGGCAC         |

**Supp. Data**FISH Cytogenetic Diagnoses

| <u>Case No.</u> | <u>FISH Diagnosis</u>                                                                                         |
|-----------------|---------------------------------------------------------------------------------------------------------------|
| 3               | nuc ish 21q22.11q22.12(RP11-79A12)x3                                                                          |
| 4               | nuc ish 3p26.1(RP11-1017D24x3)pat<br>ish del(X)(p22.13p22.13)(RP11-558P14-)[12]/Xp22.13(RP11-558P14dim)[38]dn |
| 5               | nuc ish Xp22.31(RP11692P14x2)                                                                                 |
| 9               | ish del(2)(q24.3q24.3)(RP11-454K9dim)dn<br>nuc ish Xp22.31(RP11-483M24x3)mat                                  |
| 10              | ish del(9)(q34.11q34.11)(G248P86186C8-)dn                                                                     |
| 12              | ish del(18)(q21.2q21.2)(RP11-111C17-)[32]/18q21.2(RP11-111C17x2)[168]                                         |
| 13              | ish del(X)(p21.2p21.2)(G248P88443C2-)[112]/<br>Xp21.2(G248P88443C2x1)[88]                                     |
| 20              | ish del(10)(q21.3q21.3)(RP11-715K5-)pat                                                                       |
| 27              | ish del(3)(p14.1p14.1)(G248P84614D2dim)                                                                       |

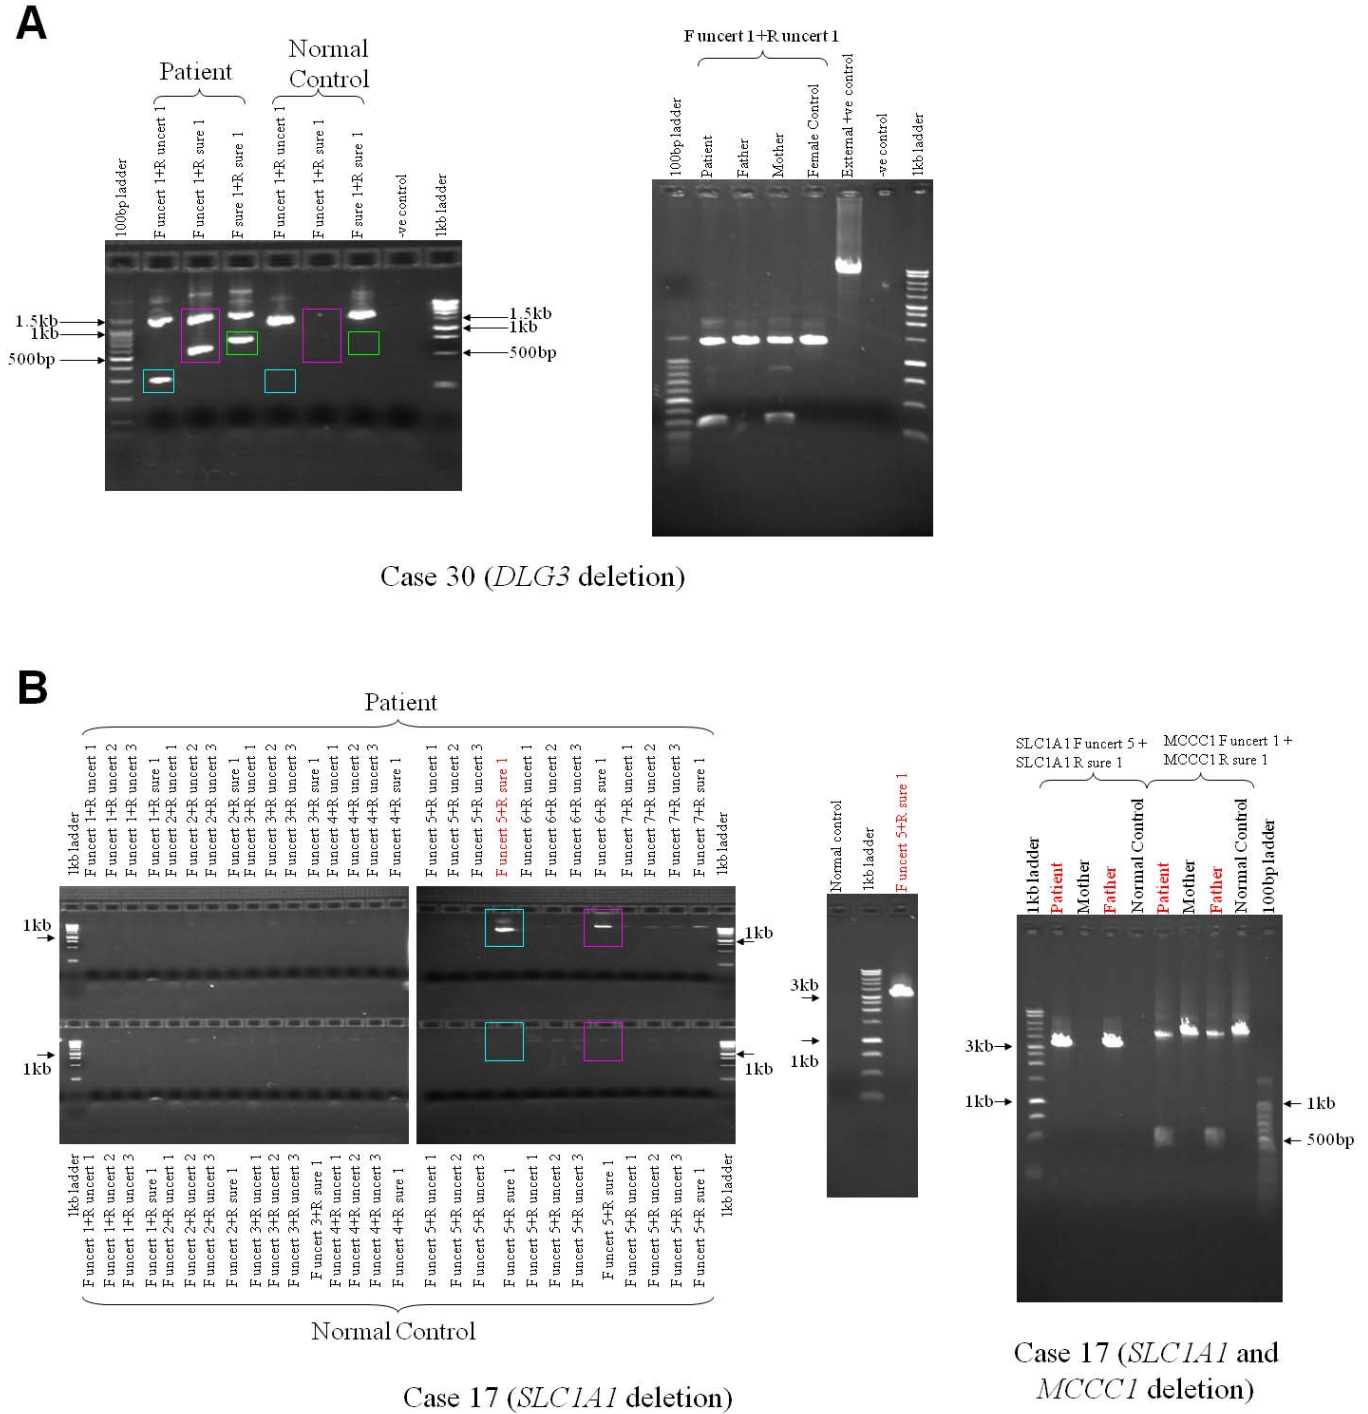

**Supp. Figure S1.** PCR confirmation of intragenic copy number changes. Intragenic deletions in: **a.** *DLG3* (case 30), and **b.** *SLC1A1* and *MCCC1* (case 17) were verified by PCR. Colored boxes help to indicate PCR products amplified from patient DNA but not from control DNA.

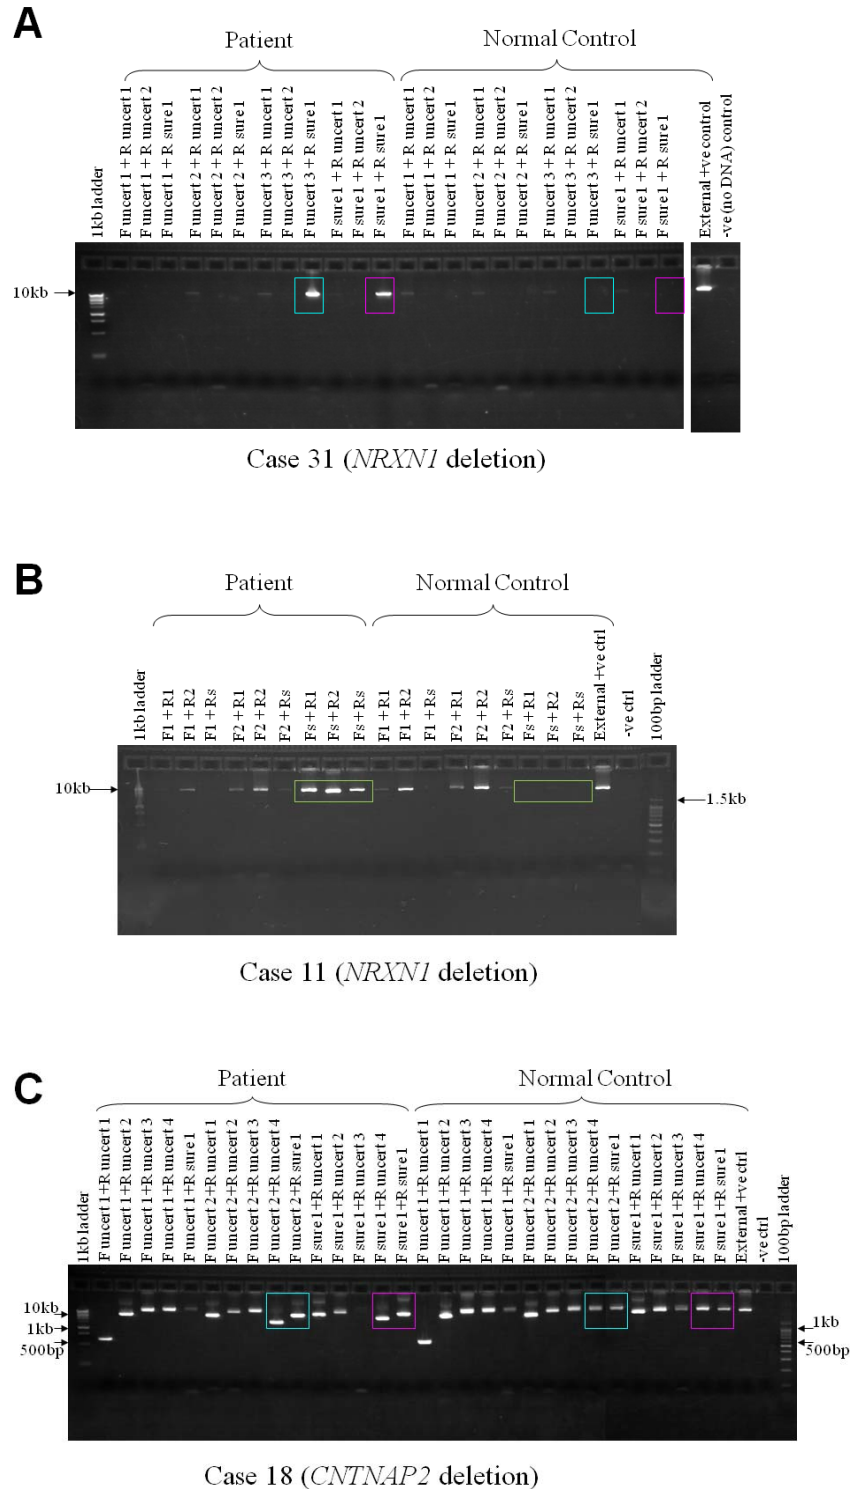

**Supp. Figure S2.** PCR confirmation of intragenic copy number changes. Intragenic deletions in: **a.** *NRXNI* (case 31), **b.** *NRXNI* (case 11), and **c.** *CNTNAP2* (case 18) were verified by PCR. Colored boxes help to indicate PCR product(s) amplified from patient DNA but not from control DNA.

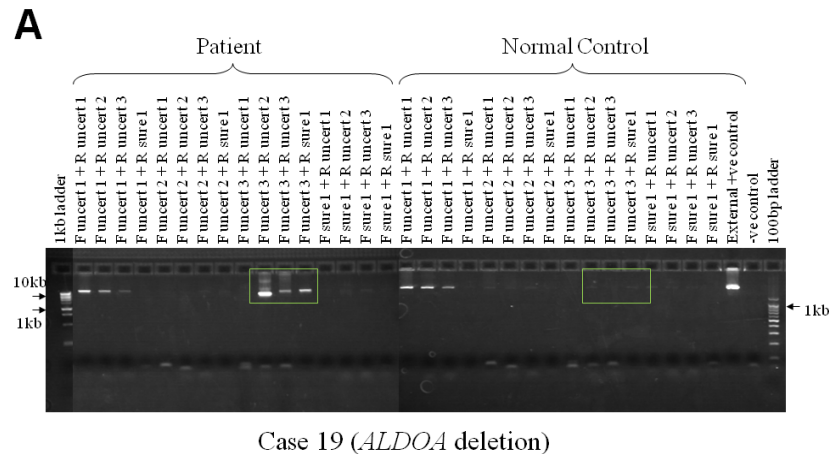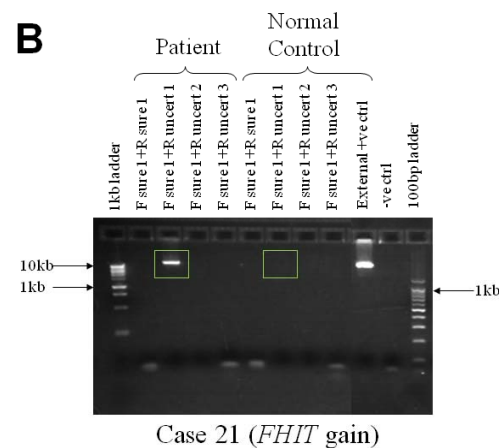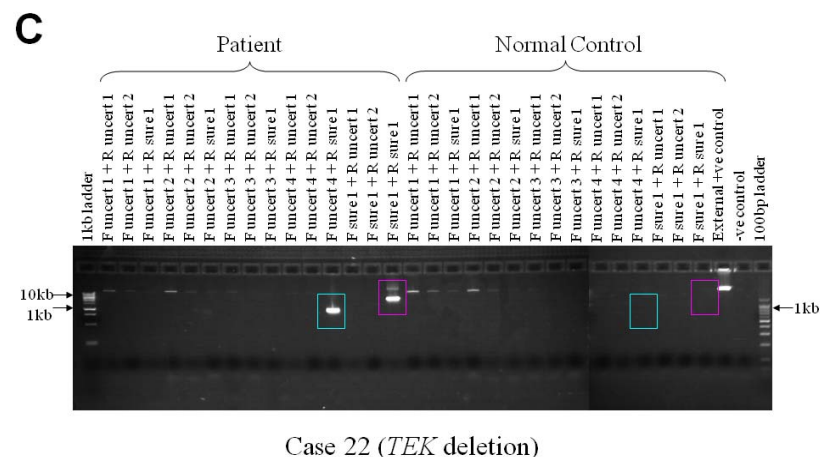

**Supp. Figure S3.** PCR confirmation of intragenic copy number changes. **a.** An intragenic deletion in *ALDOA* (case 19) was verified by PCR. **b.** An tandem, intragenic copy-number gain in *FHIT* (case 21) was verified by PCR. **c.** An intragenic deletion in *TEK* (case 22) was verified by PCR. Colored boxes help to indicate PCR product(s) amplified from patient DNA but not from control DNA.



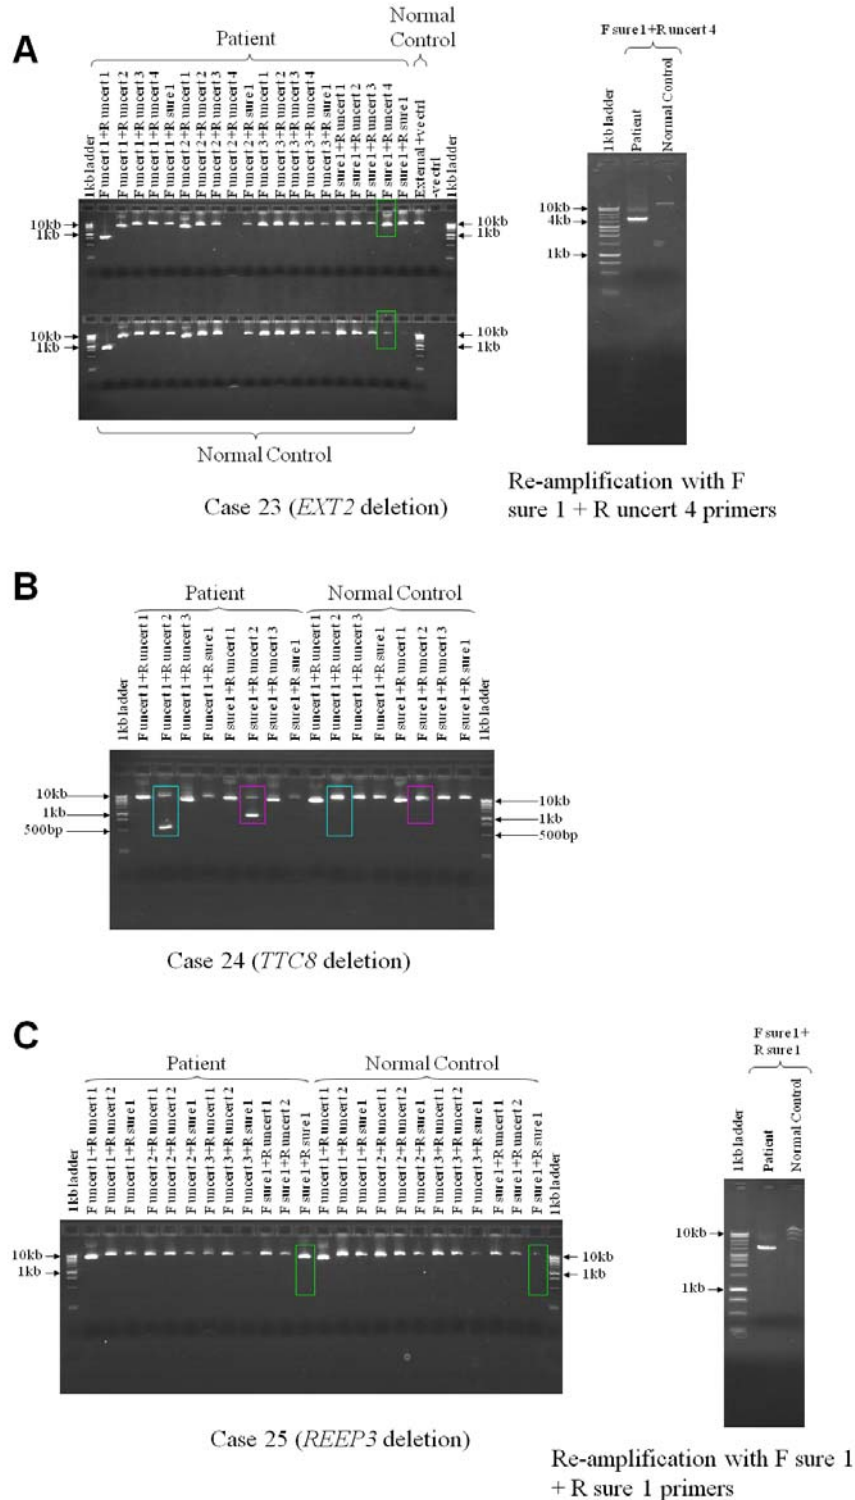

**Supp. Figure S4.** PCR confirmation of intragenic copy number changes. Intragenic deletions in: **a.** *EXT2* (case 23), **b.** *TTC8* (case 24), and **c.** *REEP3* (case 25) were verified by PCR. In some cases, colored boxes help to indicate PCR products amplified from patient DNA but not from control DNA.

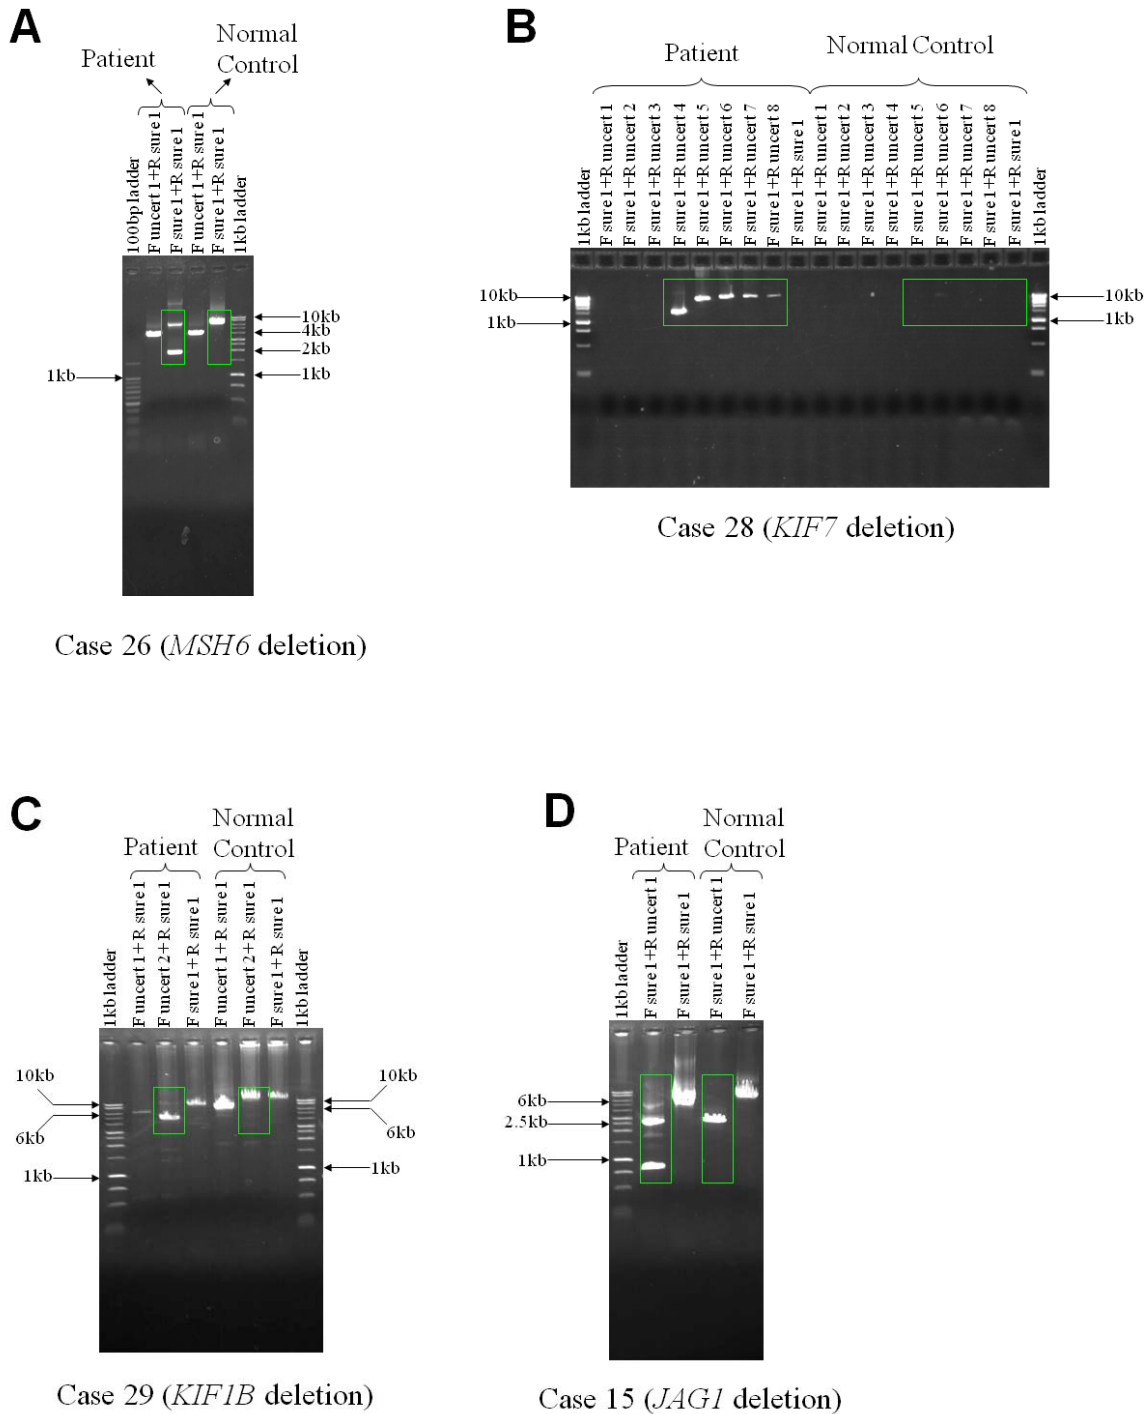

**Supp. Figure S5.** PCR confirmation of intragenic copy number changes. Intragenic deletions in: **a.** *MSH6* (case 26), **b.** *KIF7* (case 28), **c.** *KIF1B* (cases 29), and **d.** *JAG1* (case 15) were verified by PCR. In some cases, colored boxes help to indicate PCR products amplified from patient DNA but not from control DNA.

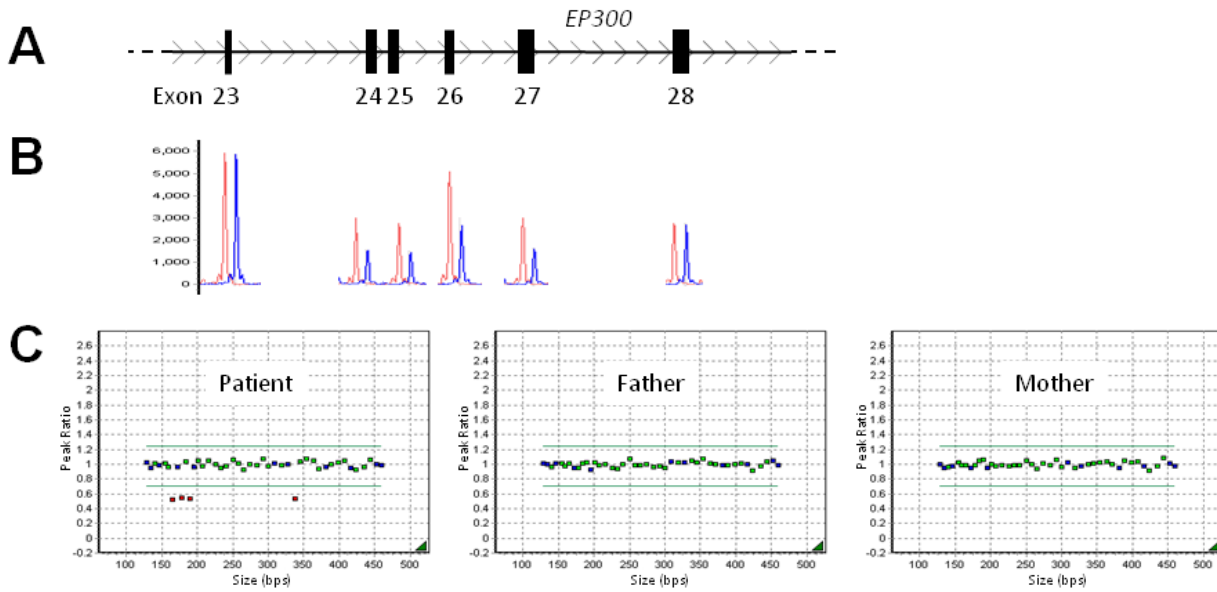Case 3 (*EP300* deletion)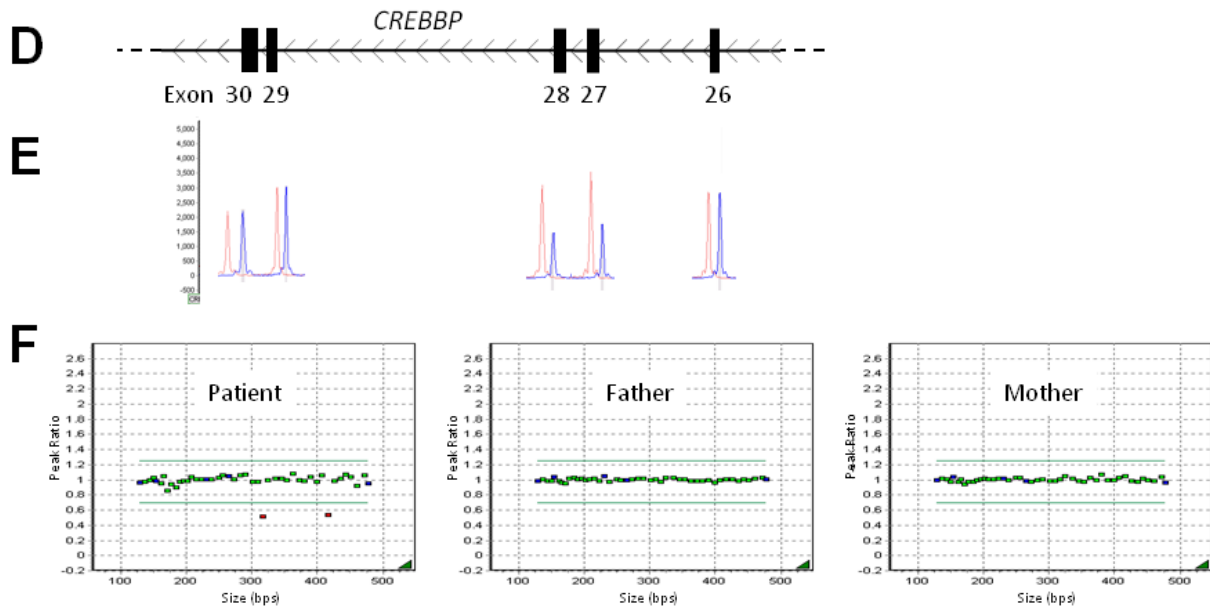Case 5 (*CREBBP* deletion)

**Supp. Figure S6.** MLPA confirmation of intragenic copy number changes. Intragenic deletions in: **a-c.** *EP300* (case 3) and **d-f.** *CREBBP* (case 5) were verified by MLPA. **a-b, d-e.** MLPA traces aligned to local genomic maps of the genes interrogated. Control traces are in red, patient traces in blue. **c, f.** Dot plots displaying normalized MLPA results in which green probes interrogate exons of the genes of interest, blue probes are controls, and red probes indicate copy change.

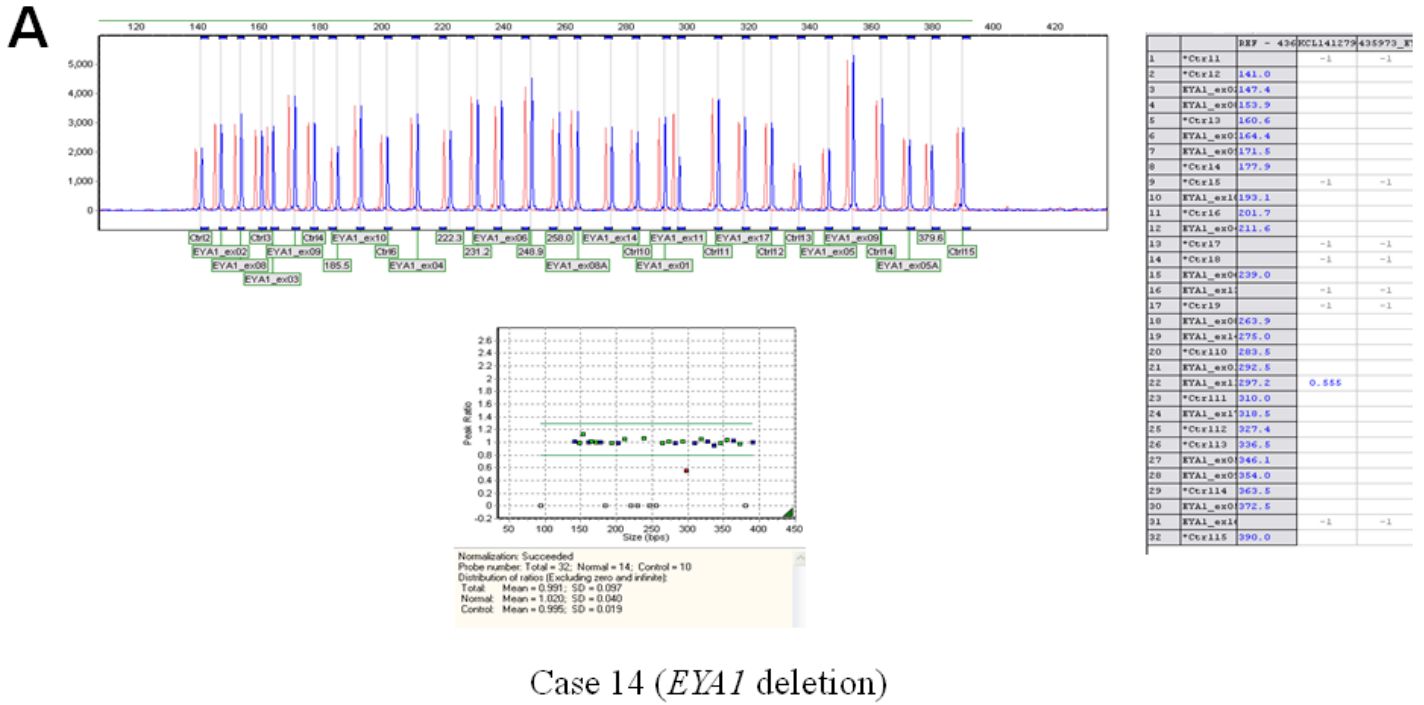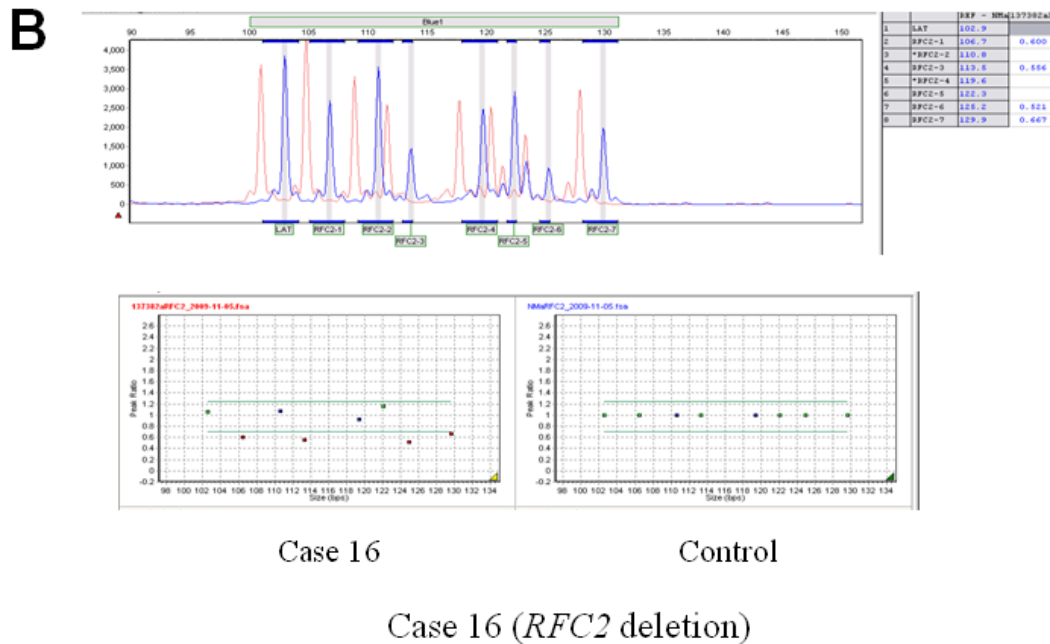

**Supp. Figure S7.** MLPA confirmation of intragenic copy number changes. Intragenic deletions in: **a.** *EYA1* (case 14) and **b.** *RFC2* (case 16) were verified by MLPA. Control traces are in red, patient traces in blue. Dot plots displaying normalized MLPA results are also displayed, in which green probes interrogate exons of the gene of interest, blue probes are controls, and red probes indicate copy change.

**Supp. Table S1. Complete listing of gene-containing CNVs**

All gene-containing copy number variations (CNVs) for each case are listed. Known benign CNV may be omitted. Exon numbers are based on the longest RefSeq transcript listed in the UCSC Genome Browser, with the exception of *CDKL5*, for which exon numbering is as in [Erez *et al.*, 2009].

| Case No. | Genes in CNV              | Chromosomal Location | Loss/Gain                                                         | De novo vs. Inherited    | Exons                                                             | Micro RNAs in region                     | Size (range unless confirmed by sequencing; Mb unless otherwise specified) | Min Interval             | Max Interval        | Mean Log <sub>2</sub> | Median Log <sub>2</sub> | No. Probes |
|----------|---------------------------|----------------------|-------------------------------------------------------------------|--------------------------|-------------------------------------------------------------------|------------------------------------------|----------------------------------------------------------------------------|--------------------------|---------------------|-----------------------|-------------------------|------------|
| 1        | <i>MECP2</i>              | Xq28                 | Loss (in a female)                                                | De novo                  | Exons 3 and 4 (partial) of 4.                                     | No                                       | 0.002-0.002                                                                | 152949428-152951487      | 152949386-152951490 | -0.5                  | -0.35                   | 25         |
| 2        | <i>PTEN</i>               | 10q23.31             | Loss                                                              | Not maternally inherited | Exons 3-5 of 9                                                    | No                                       | 0.008-0.026                                                                | 89675297-89683063        | 89675267-89701622   | -0.75                 | -0.87                   | 14         |
| 3        | <i>EP300</i>              | 22q13.2              | Loss                                                              | De novo                  | Exons 24-27 of 31                                                 | No                                       | 0.002-0.005                                                                | 39894352-39896594        | 39892913-39898247   | -0.83                 | -0.83                   | 13         |
| " "      | <i>KCNE1</i>              | 21q22.11-q22.12      | Gain                                                              | Inherited, maternally    | Whole gene                                                        | No                                       | 0.163-0.207                                                                | 34657921-34821194        | 34625313-34832077   | 0.45                  | 0.382                   | 65         |
| " "      | <i>KCNE2</i>              | " "                  | " "                                                               | " "                      | Whole gene                                                        | " "                                      | " "                                                                        | " "                      | " "                 | " "                   | " "                     | " "        |
| " "      | <i>FAM165B</i>            | " "                  | " "                                                               | " "                      | Whole gene                                                        | " "                                      | " "                                                                        | " "                      | " "                 | " "                   | " "                     | " "        |
| " "      | <i>RCAN1</i>              | " "                  | " "                                                               | " "                      | Whole gene, or exons 3-4 of 4, depending on the splice variant    | " "                                      | " "                                                                        | " "                      | " "                 | " "                   | " "                     | " "        |
| " "      | <i>Unnamed transcript</i> | " "                  | " "                                                               | " "                      | Whole gene                                                        | " "                                      | " "                                                                        | " "                      | " "                 | " "                   | " "                     | " "        |
| 4        | <i>CDKL5</i>              | Xp22.13              | Loss (in a male; mosaic; FISH showed del in 24% (12/50) of cells) | De novo                  | Exons 1-3 of 21 (exon numbering as in Erez <i>et al.</i> , 2009). | No                                       | 0.105-0.128                                                                | 18343025-18447902        | 18331857-18460326   | -0.43                 | -0.43                   | 28         |
| " "      | <i>GRM7</i>               | 3p26.1               | Gain                                                              | Inherited, paternally    | Exon 1 of 11                                                      | No                                       | 0.765-0.795                                                                | 6174990-6939651          | 6155310-6949832     | 0.55                  | 0.56                    | 40         |
| " "      | <i>Unnamed transcript</i> | " "                  | " "                                                               | " "                      | Whole gene                                                        | " "                                      | " "                                                                        | " "                      | " "                 | " "                   | " "                     | " "        |
| 5        | <i>CREBBP</i>             | 16p13.3              | Loss                                                              | De novo                  | Exons 27-28 of 31                                                 | No                                       | 0.001-0.002                                                                | 3726517-3727028          | 3726327-3728439     | -0.43                 | -0.5                    | 10         |
| " "      | <i>PNPLA4</i>             | Xp22.31              | Gain (in a male)                                                  | Inherited, maternally    | Whole gene                                                        | Yes (listed as one of the gained genes). | 0.248-0.358                                                                | 7827298-8075153          | 7801179-8159482     | 0.96                  | 0.9                     | 14         |
| " "      | <i>has-mir-651</i>        | " "                  | " "                                                               | " "                      | Whole miRNA                                                       | " "                                      | " "                                                                        | " "                      | " "                 | " "                   | " "                     | " "        |
| " "      | <i>VCX2</i>               | " "                  | " "                                                               | " "                      | Whole gene                                                        | " "                                      | " "                                                                        | " "                      | " "                 | " "                   | " "                     | " "        |
| 6        | <i>ZDHHC9</i>             | Xq25                 | Loss (in a male)                                                  | Inherited, maternally    | Exons 10-11 of 11                                                 | No                                       | 0.006-0.031                                                                | 128766911-128772552      | 128741846-128772723 | -1.27                 | -0.98                   | 10         |
| " "      | <i>SASH3</i>              | " "                  | " "                                                               | " "                      | Exons 2-8 of 8                                                    | " "                                      | " "                                                                        | " "                      | " "                 | " "                   | " "                     | " "        |
| 7        | <i>FAM58A</i>             | Xq28                 | Loss (in a female)                                                | De novo                  | Exon 5 of 5                                                       | No                                       | 0.001-0.016                                                                | 152506268-152507325      | 152494741-152510848 | -0.64                 | -0.53                   | 5          |
| " "      | <i>ATP2B3</i>             | " "                  | " "                                                               | " "                      | Exon 21 of 21                                                     | " "                                      | " "                                                                        | " "                      | " "                 | " "                   | " "                     | " "        |
| 8        | <i>HPRT1</i>              | Xq26.2               | Loss (in a male)                                                  | Inherited, maternally    | Exon 9 of 9                                                       | No                                       | 502bp (by sequencing)                                                      | ChrX:133461536-133462037 |                     | -2.48                 | -2.26                   | 3          |

| Case No. | Genes in CNV       | Chromosomal Location | Loss/Gain                                                           | De novo vs. Inherited | Exons             | Micro RNAs in region                     | Size (range unless confirmed by sequencing; Mb unless otherwise specified) | Min Interval                                              | Max Interval          | Mean Log <sub>2</sub> | Median Log <sub>2</sub> | No. Probes |
|----------|--------------------|----------------------|---------------------------------------------------------------------|-----------------------|-------------------|------------------------------------------|----------------------------------------------------------------------------|-----------------------------------------------------------|-----------------------|-----------------------|-------------------------|------------|
| 9        | <i>SCN3A</i>       | 2q24.3               | Loss                                                                | De novo               | Exon 1 of 28      | No                                       | 0.094-0.121                                                                | 165768300-165862069                                       | 165751604-165872284   | -0.75                 | -0.89                   | 26         |
| " "      | <i>SCN2A</i>       | " "                  | " "                                                                 | " "                   | Exon 1-3 of 27    | " "                                      | " "                                                                        | " "                                                       | " "                   | " "                   | " "                     | " "        |
| " "      | <i>VCX3A/VCX2</i>  | Xp22.31              | Gain (in a female)                                                  | Inherited, maternally | Whole gene        | Yes (listed as one of the gained genes). | 1.786-1.870                                                                | 6289260-8075153                                           | 6289091-8159482       | 0.46                  | 0.49                    | 95         |
| " "      | <i>HDHD1A</i>      | " "                  | " "                                                                 | " "                   | Whole gene        | " "                                      | " "                                                                        | " "                                                       | " "                   | " "                   | " "                     | " "        |
| " "      | <i>STS</i>         | " "                  | " "                                                                 | " "                   | Whole gene        | " "                                      | " "                                                                        | " "                                                       | " "                   | " "                   | " "                     | " "        |
| " "      | <i>VCX/VCX2</i>    | " "                  | " "                                                                 | " "                   | Whole gene        | " "                                      | " "                                                                        | " "                                                       | " "                   | " "                   | " "                     | " "        |
| " "      | <i>VCX2</i>        | " "                  | " "                                                                 | " "                   | Whole gene        | " "                                      | " "                                                                        | " "                                                       | " "                   | " "                   | " "                     | " "        |
| " "      | <i>PNPLA4</i>      | " "                  | " "                                                                 | " "                   | Whole gene        | " "                                      | " "                                                                        | " "                                                       | " "                   | " "                   | " "                     | " "        |
| " "      | <i>has-mir-651</i> | " "                  | " "                                                                 | " "                   | Whole miRNA       | " "                                      | " "                                                                        | " "                                                       | " "                   | " "                   | " "                     | " "        |
| 10       | <i>STXBP1</i>      | 9q34.11              | Loss                                                                | De novo               | Exons 1-4 of 20   | No                                       | 0.047-0.086                                                                | 129414011-129460757                                       | 129375646-129461836   | -0.73                 | -0.76                   | 16         |
| " "      | <i>FAM129B</i>     | " "                  | " "                                                                 | " "                   | Exon 1 of 14      | " "                                      | " "                                                                        | " "                                                       | " "                   | " "                   | " "                     | " "        |
| " "      | <i>COMT</i>        | 22q11.21             | Loss                                                                | Inherited, maternally | Exon 1 of 6       | No                                       | 0.010-0.019                                                                | 18309472-18319136                                         | 18309090-18328444     | -0.64                 | -0.61                   | 7          |
| " "      | <i>TXNRD2</i>      | " "                  | " "                                                                 | " "                   | Exon 1 of 18      | " "                                      | " "                                                                        | " "                                                       | " "                   | " "                   | " "                     | " "        |
| 11       | <i>NRXN1</i>       | 2p16.3               | Loss                                                                | Inherited, paternally | Exons 17-18 of 24 | No                                       | 17121 bp (by sequencing)                                                   | Chr2:50539661-50556784 (inclusive of 3bp microhomology)   |                       | -1                    | -1.04                   | 7          |
| 12       | <i>TCF4</i>        | 18q21.2              | Loss (mosaic; FISH showed del in 16% (32/200) of cells)             | Unknown               | Exons 3-8 of 20   | No                                       | 0.185-0.205                                                                | 51118120-51302634                                         | 51108121-51312629     | -0.54                 | -0.52                   | 35         |
| 13       | <i>ILIRAPL1</i>    | Xp21.2               | Loss (in a male; mosaic; FISH showed del in 56% (112/200) of cells) | Unknown               | Exons 7-9 of 11   | No                                       | 0.035-0.058                                                                | 29835047-29870211                                         | 29824737-29882319     | -0.98                 | -1.02                   | 13         |
| 14       | <i>EYA1</i>        | 8q13.3               | Loss                                                                | Inherited, maternally | Exon 12 of 18     | No                                       | 0.000-0.027                                                                | 72,319,254-72,319,695                                     | 72,305,679-72,332,204 | -1.03                 | -1.03                   | 4          |
| " "      | <i>CHRNA7</i>      | 15q13.3              | Gain                                                                | Inherited, maternally | Exons 1-4 of 10   | No                                       | 0.150-0.716                                                                | 30,083,430-30,233,204                                     | 29,517,737-30,233,287 | 0.5                   | 0.49                    | 25         |
| " "      | <i>OTUD7A</i>      | " "                  | " "                                                                 | " "                   | Whole gene        | " "                                      | " "                                                                        | " "                                                       | " "                   | " "                   | " "                     | " "        |
| 15       | <i>JAG1</i>        | 20p12.2              | Loss                                                                | De novo               | Exons 6-8 of 26   | No                                       | .001-.006                                                                  | 10,579,979-10,581,413                                     | 10,579,088-10,584,793 | -0.62                 | -0.73                   | 9          |
| 16       | <i>RFC2</i>        | 7q11.23              | Loss                                                                | Inherited, paternally | Exons 1-5 of 11   | No                                       | 0.023-0.046                                                                | 73298702-73321373                                         | 73295832-73341361     | -0.68                 | -0.79                   | 17         |
| 17       | <i>SLC1A1</i>      | 9p24.2               | Loss                                                                | Inherited, paternally | Exon 1 of 12      | No                                       | 0.073-0.129                                                                | 4418574-4491934                                           | 4372543-4501065       | -0.76                 | -0.87                   | 9          |
| " "      | <i>MCCC1</i>       | 3q27.1               | Loss                                                                | Inherited, paternally | Exons 2-3 of 19   | No                                       | 0.002-0.008                                                                | 184292729-184295167                                       | 184287564-184295402   | -0.9                  | -0.97                   | 7          |
| 18       | <i>CNTNAP2</i>     | 7q35                 | Loss                                                                | Unknown               | Exon 8 of 24      | No                                       | 9958 bp (by sequencing)                                                    | Chr7:146458392-146468351 (inclusive of 2bp microhomology) |                       | -0.79                 | -0.77                   | 4          |

| Case No. | Genes in CNV                 | Chromosomal Location | Loss/Gain          | De novo vs. Inherited    | Exons                    | Micro RNAs in region         | Size (range unless confirmed by sequencing; Mb unless otherwise specified) | Min Interval                                              | Max Interval            | Mean Log <sub>2</sub> | Median Log <sub>2</sub> | No. Probes |
|----------|------------------------------|----------------------|--------------------|--------------------------|--------------------------|------------------------------|----------------------------------------------------------------------------|-----------------------------------------------------------|-------------------------|-----------------------|-------------------------|------------|
| 19       | <i>ALDOA</i>                 | 16p11.2              | Loss               | Unknown                  | Exon 1-4 of 14           | No                           | 13,885 bp (by sequencing)                                                  | Chr16: 29,961,204-29,975,150 (inclusive of 62bp homology) |                         | -0.64                 | -0.63                   | 18         |
| " "      | X Chromosome (Klinefelter's) | Whole chromosome     | Gain               | Unknown                  | -                        | -                            | Whole Chromosome                                                           |                                                           |                         | 0.76                  | 0.84                    | 13,040     |
| 20       | <i>CTNNA3</i>                | 10q21.3              | Loss               | Inherited, paternally    | Exons 10-11 of 18        | No                           | 0.101-0.367                                                                | 67950370-68051567                                         | 67809125-68176504       | -0.95                 | -1.01                   | 6          |
| 21       | <i>FHIT</i>                  | 3p14.2               | Gain               | Inherited, paternally    | Exon 4 of 10             | No                           | 17,936 bp (by sequencing)                                                  | chr3:60,779,651-60,797,586 (exact)                        |                         | 0.83                  | 0.89                    | 6          |
| " "      | <i>Unnamed transcript</i>    | 3q13.11              | Loss               | Inherited, paternally    | Whole transcript         | No                           | 0.460-0.555                                                                | 105005505-105465469                                       | 104945375-105499895     | -0.69                 | -0.68                   | 13         |
| 22       | <i>TEK</i>                   | 9p21.2               | Loss               | Unknown                  | Exons 3-9 of 23          | No                           | 29,964b bp (by sequencing)                                                 | Chr9:27150274-27180241 (inclusive of 4bp microhomology)   |                         | -0.53                 | -0.61                   | 27         |
| 23       | <i>EXT2</i>                  | 11p11.2              | Loss               | Unknown                  | Exon 12 of 16            | No                           | 0.001-0.022                                                                | 44,184,602-44,185,360                                     | 44,176,244-44,197,768   | -0.85                 | -0.82                   | 5          |
| 24       | <i>TTC8</i>                  | 14q31.3              | Loss               | Unknown                  | Exons 3-6 of 14          | No                           | 0.004-0.013                                                                | 88,376,567-88,380,220                                     | 88,375,994-88,388,896   | -0.78                 | -0.87                   | 9          |
| 25       | <i>REEP3</i>                 | 10q21.3              | Loss               | Inherited, paternally    | Exons 7-8 of 8           | No                           | 0.003-0.018                                                                | 65,048,965-65,052,014                                     | 65,040,526-65,058,056   | -0.87                 | -0.9                    | 13         |
| 26       | <i>MSH6</i>                  | 2p16.3               | Loss               | Unknown                  | Exons 4-10 of 10         | No                           | 0.004-0.006                                                                | 47,884,010-47,887,581                                     | 47,881,791-47,887,705   | -0.81                 | -0.8                    | 15         |
| " "      | <i>FBXO11</i>                | " "                  | " "                | " "                      | Exon 23 of 23            | " "                          | " "                                                                        | " "                                                       | " "                     | " "                   | " "                     | " "        |
| 27       | <i>FOXP1</i>                 | 3p14.1               | Loss               | Unknown                  | Exons 14-21 of 21        | No                           | 0.029-0.030                                                                | 71090495-71119790                                         | 71090029-71119919       | -0.49                 | -0.54                   | 27         |
| 28       | <i>KIF7</i>                  | 15q26.1              | Loss               | Inherited, paternally    | Exons 1-2 of 19          | No                           | .003-.032                                                                  | 87997345-88000145                                         | 87996808-88028535       | -0.96                 | -1.04                   | 4          |
| " "      | <i>PLIN1</i>                 | " "                  | " "                | " "                      | Whole gene               | " "                          | " "                                                                        | " "                                                       | " "                     | " "                   | " "                     | " "        |
| " "      | <i>PEX11A</i>                | " "                  | " "                | " "                      | Exon 3 of 3              | " "                          | " "                                                                        | " "                                                       | " "                     | " "                   | " "                     | " "        |
| 29       | <i>KIF1B</i>                 | 1p36.22              | Loss               | Inherited, paternally    | Exons 37-41 of 47        | No                           | .005-.012                                                                  | 10,343,400-10,348,260                                     | 10,335,800-10,348,286   | -0.64                 | -0.62                   | 16         |
| " "      | <i>TAAR2</i>                 | 6q23.2               | Gain               | Unknown                  | Whole gene               | Yes (among the listed genes) | 0.293-0.416                                                                | 132,984,448-133,277,043                                   | 132,959,124-133,374,834 | 0.67                  | 0.65                    | 5          |
| " "      | <i>TAAR1</i>                 | " "                  | " "                | " "                      | Whole gene               | " "                          | " "                                                                        | " "                                                       | " "                     | " "                   | " "                     | " "        |
| " "      | <i>VNN1</i>                  | " "                  | " "                | " "                      | Whole gene               | " "                          | " "                                                                        | " "                                                       | " "                     | " "                   | " "                     | " "        |
| " "      | <i>VNN3</i>                  | " "                  | " "                | " "                      | Whole gene               | " "                          | " "                                                                        | " "                                                       | " "                     | " "                   | " "                     | " "        |
| " "      | <i>VNN2</i>                  | " "                  | " "                | " "                      | Whole gene               | " "                          | " "                                                                        | " "                                                       | " "                     | " "                   | " "                     | " "        |
| " "      | <i>Unnamed transcript</i>    | " "                  | " "                | " "                      | Whole gene               | " "                          | " "                                                                        | " "                                                       | " "                     | " "                   | " "                     | " "        |
| " "      | <i>RPS12</i>                 | " "                  | " "                | " "                      | Whole gene               | " "                          | " "                                                                        | " "                                                       | " "                     | " "                   | " "                     | " "        |
| " "      | <i>SNORD101</i>              | " "                  | " "                | " "                      | Whole gene               | " "                          | " "                                                                        | " "                                                       | " "                     | " "                   | " "                     | " "        |
| " "      | <i>SNORD100</i>              | " "                  | " "                | " "                      | Whole gene               | " "                          | " "                                                                        | " "                                                       | " "                     | " "                   | " "                     | " "        |
| " "      | <i>SNORA33</i>               | " "                  | " "                | " "                      | Whole gene               | " "                          | " "                                                                        | " "                                                       | " "                     | " "                   | " "                     | " "        |
| 30       | <i>DLG3</i>                  | Xq13.1               | Loss (in a female) | Inherited, maternally    | Intron 18.               | No                           | 1099 bp (by sequencing)                                                    | ChrX:69637575-69638673                                    |                         | -0.79                 | -0.83                   | 3          |
| 31       | <i>NRXN1</i>                 | 2p16.3               | Loss               | Not maternally inherited | Intron 3 of 23 (introns) | No                           | 30,792 bp (by sequencing)                                                  | Chr2:51072619-51103413 (inclusive of 3bp microhomology)   |                         | -0.83                 | -0.8                    | 3          |

Supp. Table S2. Results of DNA sequencing at deletion and duplication breakpoints

| Case No. | Gene           | Size (bp) and CNV type | Sequence                                                                                                                                                                                                      | Features                                   | Repetitive elements at Breakpoint <sup>a</sup> |                  | Predicted molecular consequence                                    |
|----------|----------------|------------------------|---------------------------------------------------------------------------------------------------------------------------------------------------------------------------------------------------------------|--------------------------------------------|------------------------------------------------|------------------|--------------------------------------------------------------------|
|          |                |                        |                                                                                                                                                                                                               |                                            | Left                                           | Right            |                                                                    |
| 8        | <i>HPRT1</i>   | 502 del                | L: AACAAATTA <del>AACTA</del> ATGTGATAGACTACTGCTTTGTTTTCAAAAAGA<br>S: AACAAATTA <del>AACTA</del> CTGCTTTTACTACTGTAA <del>ACTATTGAGTGAAA</del><br>R: TTGTAATGAAAAAATTCTCTTAAACCACAGC <del>ACTATTGAGTGAAA</del> | 18 bp insertion;<br>7 flanking repeated bp | -                                              | -                | Del of coding region of final exon                                 |
| 11       | <i>NRXN1</i>   | 17,121 del             | L: TATTAGCACTGAAATATGTTGAT<br>S: TATTAGCACTGAA <del>CATGTACAAT</del><br>R: AAGAAGTAGA <del>GAA</del> CATGTACAAT                                                                                               | 3 bp micro-homology                        | -                                              | -                | In-frame del of coding exons                                       |
| 18       | <i>CNTNAP2</i> | 9,958 del              | L: TAGGAGGATCACTTGAGCCAC<br>S: TAGGAGGATCA <del>CAACCTGCTGC</del><br>R: CCCTAGACGTAC <del>CAACCTGCTGC</del>                                                                                                   | 2 bp micro-homology                        | <i>AluJo</i> (+)                               | -                | Frameshift and premature termination codon                         |
| 19       | <i>ALDOA</i>   | 13,885 del             | L: CACCACCACCCAGCTAAT...GGCTGGTCTCAA <del>ACTCCTGA</del><br>S: CACCACCACCCAGCTAAT...GGCTGGTCTCGAA <del>CTCCTGA</del><br>R: TGCCACCACG <del>CCCAGCTAAT...GGCTGGTCTCGAACTCCTGA</del>                            | 62 bp homology                             | <i>AluSq</i> (-)                               | <i>AluSx</i> (-) | Del of multiple 5' UTR exons in some splice variants               |
| 21       | <i>FHIT</i>    | 17,936 gain            | L: CTATCTTGGGTCTCAGTCTA<br>S: CTATCTTGGGAAATGGGAAA<br>R: AAAAGTTGTA <del>AAATGGGAAA</del>                                                                                                                     | No micro-homology                          | L1ME b (-)                                     | LTR3 8B (-)      | Gain of a 5' UTR exon                                              |
| 22       | <i>TEK</i>     | 29,964 del             | L: CCTCCCACTATGGCCTCTCAAAGT<br>S: CCTCCCACTATGGCTGGTCACGAT<br>R: ACTCAAGGCC <del>TGGCTGGTCACGAT</del>                                                                                                         | 4 bp micro-homology                        | <i>AluJo</i> (-)                               | L2 (-)           | In-frame del of coding exons                                       |
| 30       | <i>DLG3</i>    | 1,099 del              | L: GTAAGACTCCTG CTGCCCTGCGGGGGG<br>S: GTAAGACTCCAT ACTCCATTGCTGGGT<br>R: TTGTTGGGAGAG GCAGGATTGCTGGGT                                                                                                         | 7 bp insertion /<br>7 tandem repeated bp   | -                                              | -                | Intronic del; possible intron retention owing to small intron size |
| 31       | <i>NRXN1</i>   | 30,792 del             | L: AGGTCTGGATCAA <del>CAGTGTGTAC</del><br>S: AGGTCTGGATCAA <del>AATATTTTCC</del><br>R: CAAGCACCTA <del>CAA</del> AATATTTTCC                                                                                   | 3 bp micro-homology                        | -                                              | -                | Intronic del                                                       |

<sup>a</sup> Obtained from the UCSC Genome Browser.

del = deletion; L = “left” breakpoint region; S = sequenced fragment; R = “right” breakpoint region; bold text = perfect homology to sequenced PCR product; solid underline = microhomology; dotted underline = duplicated sequences; (+) = “forward” orientation with respect to the reference sequence; (-) = reverse orientation with respect to the reference sequence.
